# Supplementary material
Source: Springer Nature journal article supplement (https://www.springermedizin.de/resource/supplementary/12885_2007_1011_MOESM1_ESM.pdf/9471908)

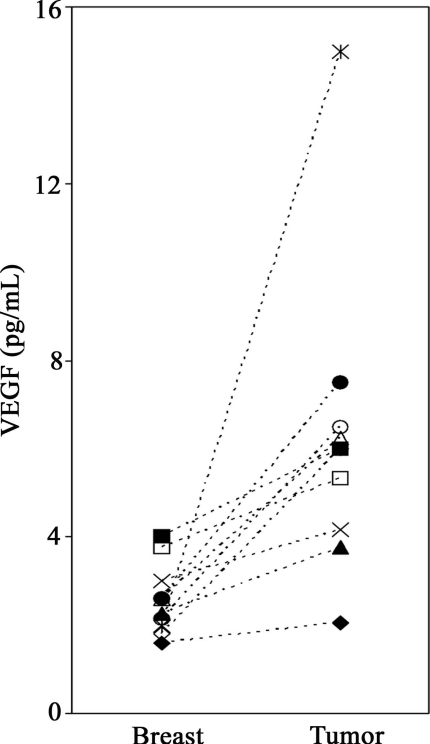

Supplement: MOESM1 [file 9471908]
